# Supplementary material
Source: Springer Nature journal article supplement (https://www.springermedizin.de/resource/supplementary/13054_2013_2852_MOESM2_ESM.pdf/9713784)
Supplement: MOESM2 [file 9713784]

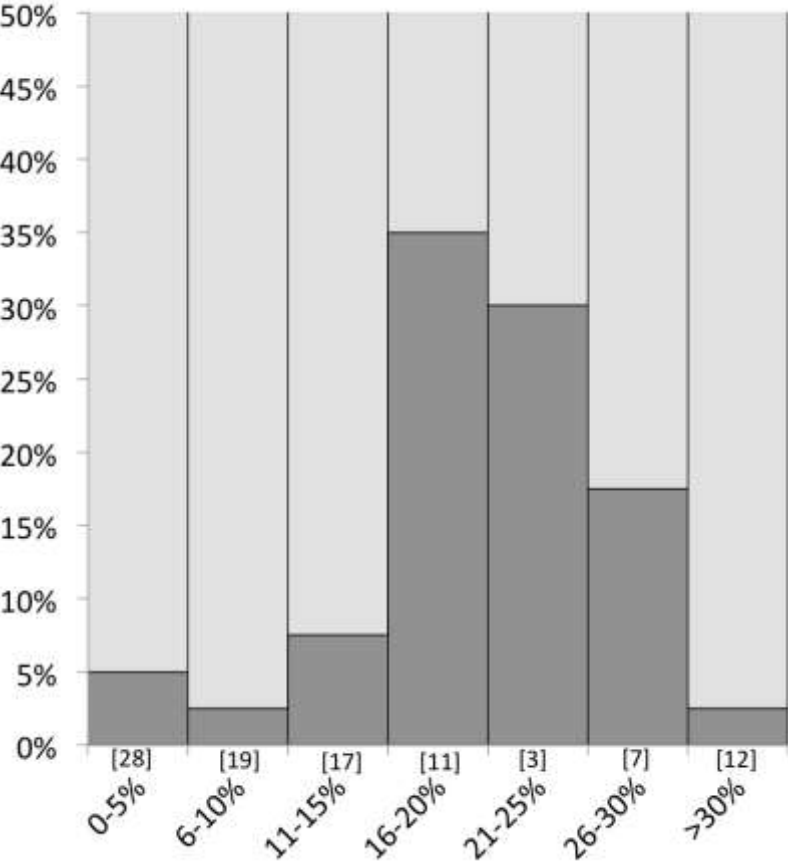

Percentage of concordant qualitative dIVC assessments, relative to the quantitative assessment

Percentage of erroneous qualitative dIVC assessments, relative to the quantitative assessment

[n]: number of patients
